# Supplementary material
Source: PubMed Central journal article supplement (PMC6389861)
Supplement: dey374_supplement_table1.pdf [file dey374_supplement_table1.pdf]

**Supplementary Table S1** Estimated probability of live birth by quartile of age (*N* = 642 cycles).

| Quartile of age | Age range (years) | Probability of live birth (95% CI) |                      |
|-----------------|-------------------|------------------------------------|----------------------|
|                 |                   | Model 1 <sup>1</sup>               | Model 2 <sup>2</sup> |
| 1               | 21–32             | 0.49<br>(0.40, 0.62)               | 0.46<br>(0.37, 0.58) |
| 2               | 33–35             | 0.44<br>(0.35, 0.56)               | 0.42<br>(0.33, 0.54) |
| 3               | 36–38             | 0.32<br>(0.24, 0.43)               | 0.31<br>(0.23, 0.41) |
| 4               | 39–43             | 0.23<br>(0.17, 0.31)               | 0.24<br>(0.17, 0.32) |

<sup>1</sup>Estimated from the unadjusted mixed effects model.

<sup>2</sup>Estimated from the mixed effects model adjusted for BMI, smoking status and infertility diagnosis.

All continuous covariates in predicted marginal means are set to their mean values. All categorical covariates are weighted across levels of the variable, according to their relative frequency.
